# Supplementary material for: Alginate/lignin: Antioxidant Activities, Anticancer Activity, Physico-chemistry Characteristics, and Acute Toxicity
Source: Preprints.org preprint supplement (doi:10.20944/preprints202305.1137.v1), 2023-05-16
Supplement: Supplementary file 1 [file supplementary]

## **Alginate/lignin: Antioxidant Activities, Anticancer Activity, Physico-chemistry Characteristics, and Acute Toxicity**

Nguyen Xuan Hoan <sup>1</sup>, Le Thi Hong Anh <sup>2</sup>, Hoang Thai Ha <sup>3,\*</sup>, and Dang Xuan Cuong <sup>4</sup>

<sup>1</sup> Faculty of Biology and Environment, Ho Chi Minh City University of Food Industry, 140 Le Trong Tan, Tan Phu District, Ho Chi Minh 70000, Vietnam; hoannx@hufi.edu.vn

<sup>2</sup> Faculty of Food Technology, Ho Chi Minh City University of Food Industry, 140 Le Trong Tan, Tan Phu District, Ho Chi Minh 70000, Vietnam; anhth@hufi.edu.vn

<sup>3</sup> Faculty of Food Technology, Ho Chi Minh City University of Food Industry, 140 Le Trong Tan, Tan Phu District Ho Chi Minh 70000, Vietnam; haht@hufi.edu.vn

<sup>4</sup> Dept. Science and Technology, Ho Chi Minh City University of Food Industry, 140 Le Trong Tan, Tan Phu District, Ho Chi Minh 70000, Vietnam; cuongdx@hufi.edu.vn

\* Correspondence: haht@hufi.edu.vn; Tel.: +84-932.082.199 (H.T.H.)

Received: date; Accepted: date; Published: date

**Abstract:** Alginate/lignin is a synthetic polymer rich in the biological activity of great interest. Alginate is extracted from seaweed and lignin is extracted from corn stalks and leaves. Antioxidant activities of alginate/lignin were evaluated such as total antioxidant activity, reducing power activity, DPPH free radical scavenging activity, and  $\alpha$  – glucosidase inhibition activity. Anticancer activity was evaluated on four cell lines (Hep G2, fibroblast, MCF-7, and NCI H460). Physicochemistry characteristics of alginate/lignin were determined through FTIR, DSC, SEM\_EDS, SEM\_EDS mapping, XRD, XRF, and <sup>1</sup>H-NMR. Acute toxicity of alginate/lignin was studied on *Swiss albino* mice. The results showed alginate/lignin possessed antioxidant activity such as total antioxidant activity, reducing power activity, especially,  $\alpha$  – glucosidase inhibition activity, and no free radical scavenging activity. Alginate/lignin did not be typical in cancer cell lines. Alginate/lignin existed in a thermally stable regular spherical shape in the investigated thermal region. Some specific functional groups of alginate and lignin did not exist in alginate/lignin crystal. Elements such as C, O, Na, and S were popular in the alginate/lignin structure. LD<sub>0</sub> and LD<sub>100</sub> of alginate/lignin in mice were 3.91 g/kg and 9.77 g/kg, respectively. Alginate/lignin is the potential for application as pharmaceutical materials, functional foods, and supporting diabetes treatment.

**Keywords:** antioxidant; anticancer; glucosidase, physic-chemistry characteristics, acute toxicity

Table S1. Mass and atom of elements in alginate/lignin on SEM\_EDS mapping.

| Display name          |  | Standard data | Quantification method | Result Type |
|-----------------------|--|---------------|-----------------------|-------------|
| Map_007_wholespectrum |  | Standardless  | ZAF                   | Metal       |

  

| Element               | Line | Mass%                | Atom%      |
|-----------------------|------|----------------------|------------|
| C                     | K    | 22.16±0.08           | 31.20±0.11 |
| O                     | K    | 41.55±0.13           | 43.91±0.13 |
| Na                    | K    | 27.62±0.12           | 20.32±0.09 |
| S                     | K    | 8.66±0.08            | 4.57±0.04  |
| Total                 |      | 100.00               | 100.00     |
| Map_007_wholespectrum |      | Fitting ratio 0.0210 |            |
